# Supplementary material for: Exploring edge functionalised blue phosphorene nanoribbons as novel photocatalysts for water splitting
Source: Royal Society of Chemistry journal article supplement (doi:10.1039/d0nj03950k), 2021-01-01
Supplement: d0nj03950k1.pdf [file d0nj03950k1.pdf]

## Electronic Supplementary Information (ESI)

### Exploring edge functionalised blue phosphorene nanoribbons as novel photocatalysts for water splitting

Ashakiran Maibam,<sup>a,b,#</sup> Debalina Chakraborty<sup>a,#</sup> Krati Joshi,<sup>a</sup> Sailaja Krishnamurthy<sup>a, b\*</sup>

<sup>a</sup>Physical and Materials Chemistry Division, National Chemical Laboratory, Pashan Road, Pune 411008, India.

<sup>b</sup>Academy of Scientific and Innovative Research, CSIR-Human Resource Development Centre (CSIR-HRDC) Campus, Postal Staff College area, Gaziabad, 201 002 Uttar Pradesh, India.

E-mail: k.sailaja@ncl.res.in, sailaja.raaj@gmail.com

Contents:

1. Fig. S1: **Side view of water adsorbed functionalised BPNRs**
2. Fig. S2: (a)**Band structure of bare zigzag BPNR, (b) band structure of bare armchair BPNR.**
3. Fig. S3: **Band structure of all functionalised BPNRs.**
4. Table S1: **Band edge positions (CBM and VBM) of functionalised BPNRs.**
5. Table S1: **Adsorption energy, O-H bond length of zigzag functionalised water adsorbed BPNRs.**
6. Table S2: **Adsorption energy, O-H bond length of armchair functionalised water adsorbed BPNRs.**

Side view of functionalised zigzag and armchair BPNRs. Tabular form of their adsorption energy, O-H bond length of adsorbed water molecule, symmetric and symmetric stretching frequency. The adsorption energy plot of armchair functionalised BPNRs.

|                                                                                                                                        |                                                                                                                                           |
|----------------------------------------------------------------------------------------------------------------------------------------|-------------------------------------------------------------------------------------------------------------------------------------------|
| 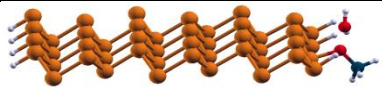 <p>CH<sub>3</sub>O zigzag functionalised BPNR</p>    |  <p>CH<sub>3</sub>O armchair functionalised BPNR</p>    |
|  <p>COOCH<sub>3</sub> zigzag functionalised BPNR</p>  |  <p>COOCH<sub>3</sub> armchair functionalised BPNR</p>  |
|  <p>CHO zigzag functionalised BPNR</p>                |  <p>CHO armchair functionalised BPNR</p>                |
|  <p>COOH zigzag functionalised BPNR</p>               |  <p>COOH armchair functionalised BPNR</p>               |
|  <p>OH zigzag functionalised BPNR</p>               |  <p>OH armchair functionalised BPNR</p>               |
|  <p>NH<sub>2</sub> zigzag functionalised BPNR</p>   |  <p>NH<sub>2</sub> armchair functionalised BPNR</p>   |
|  <p>CONH<sub>2</sub> zigzag functionalised BPNR</p> |  <p>CONH<sub>2</sub> armchair functionalised BPNR</p> |
|  <p>SH zigzag functionalised BPNR</p>               |  <p>SH armchair functionalised BPNR</p>               |
|                                                     |                                                       |

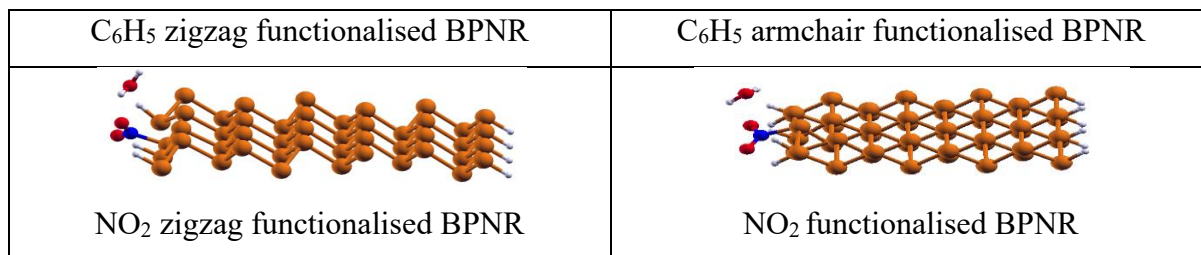

Fig. S1 Side view of water adsorbed functionalised BPNRs

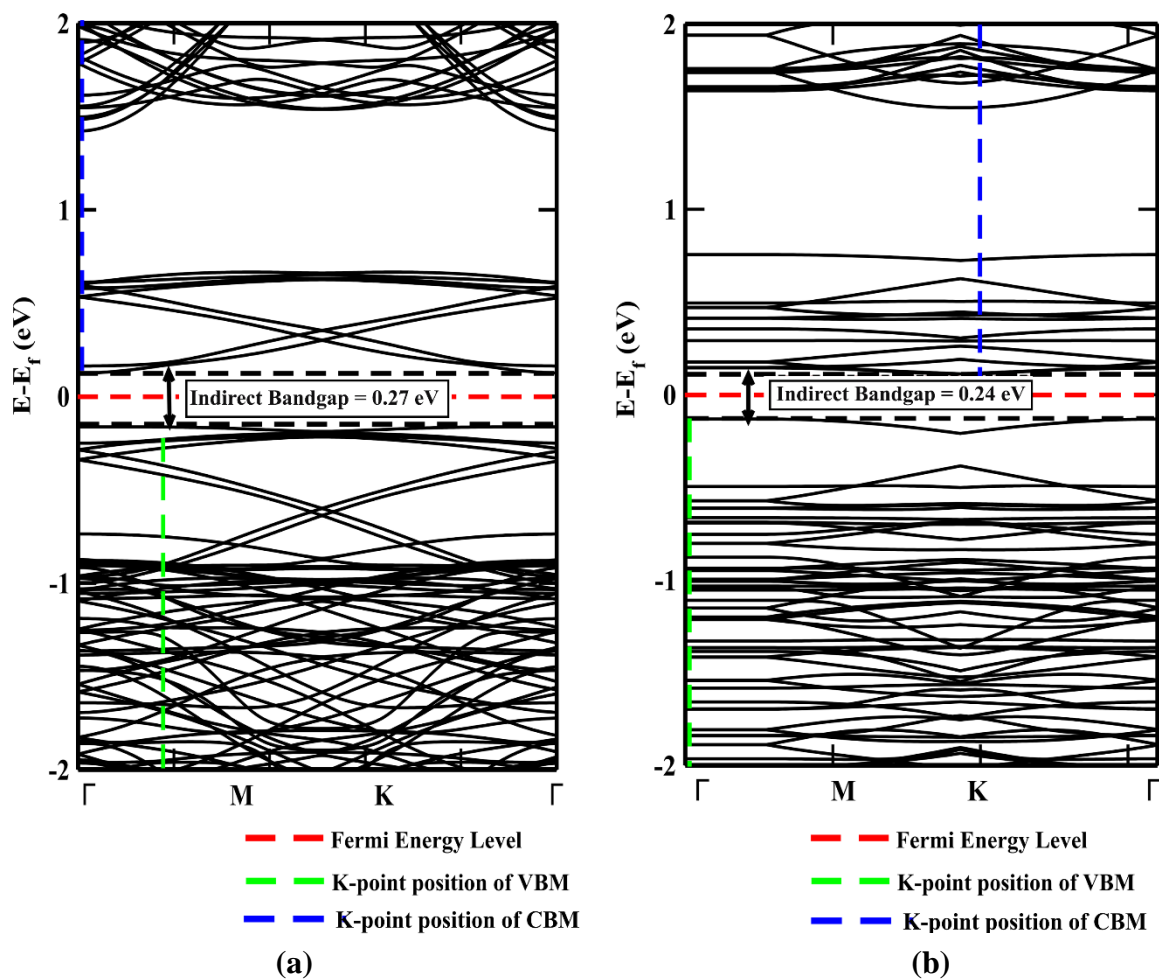

Fig.S2 (a) Band structure of bare zigzag BPNR, (b) Band structure of bare armchair BPNR.

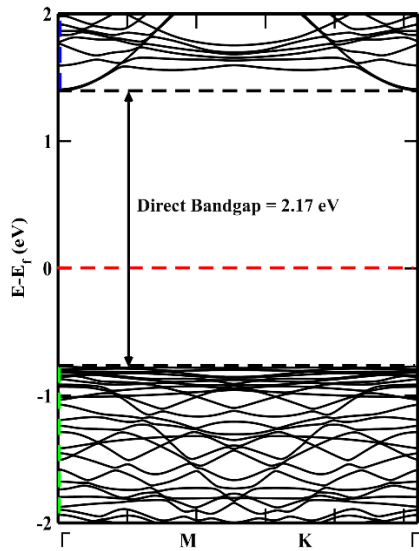

**CH<sub>3</sub>O functionalised zigzag BPNR**

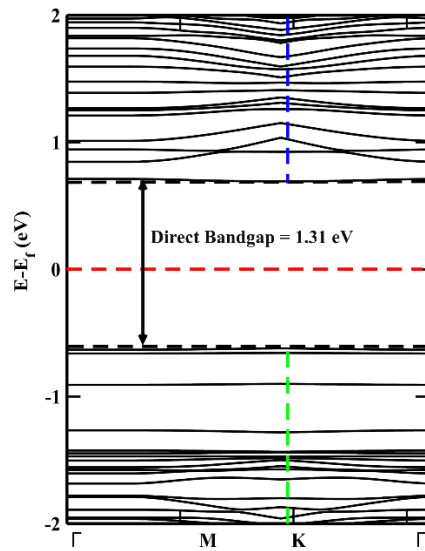

**CH<sub>3</sub>O functionalised armchair BPNR**

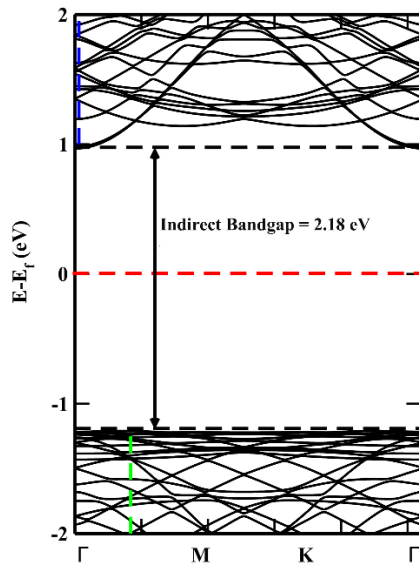

**COOCH<sub>3</sub> functionalised zigzag BPNR**

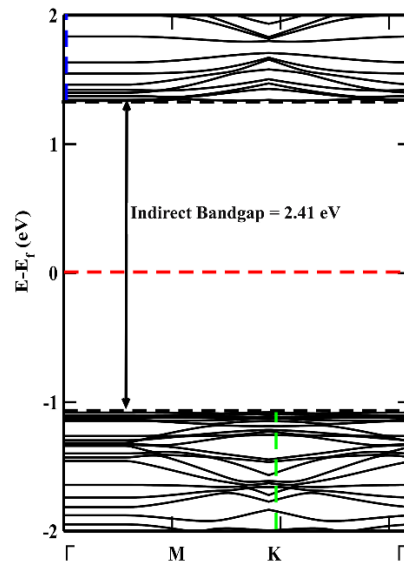

**COOCH<sub>3</sub> functionalised armchair BPNR**

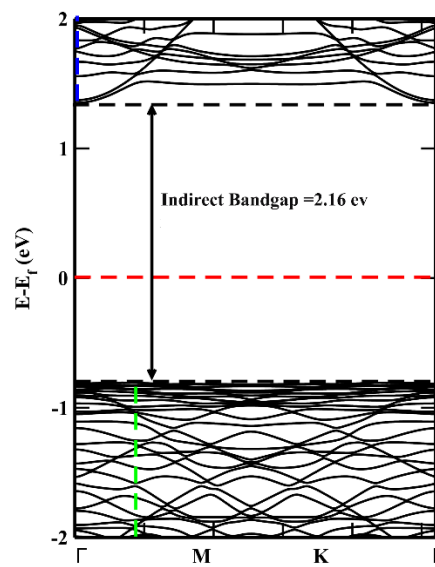

**CHO functionalised zigzag BPNR**

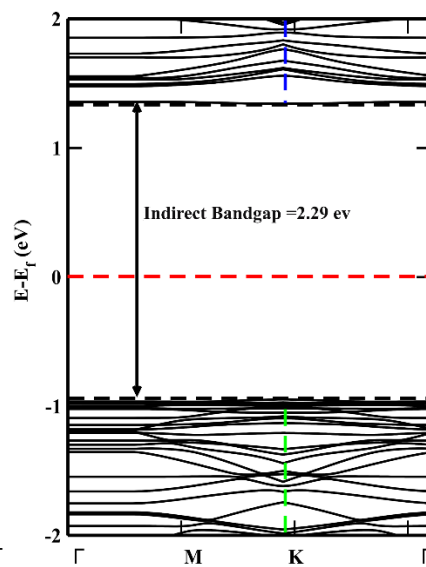

**CHO functionalised armchair BPNR**

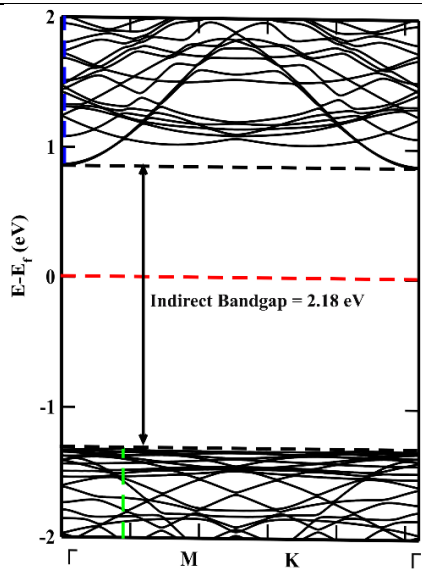

**COOH functionalised zigzag BPNR**

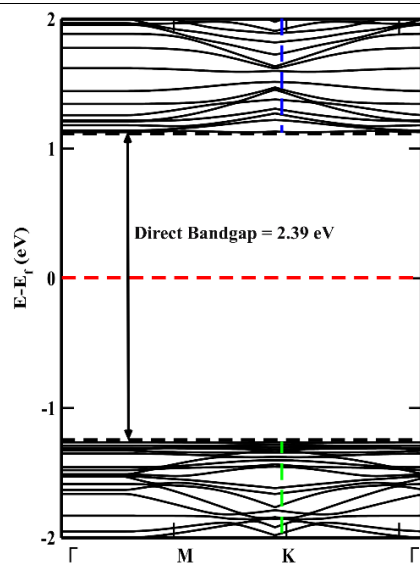

**COOH functionalised armchair BPNR**

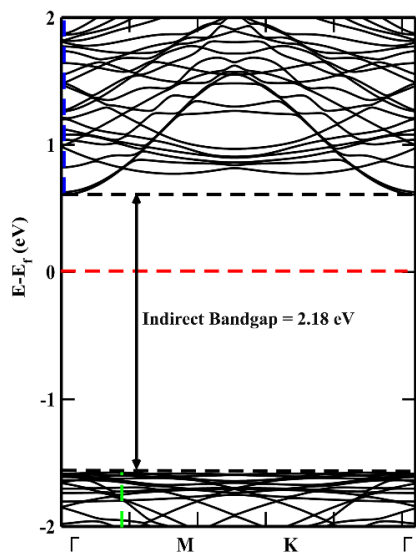

**OH functionalised zigzag BPNR**

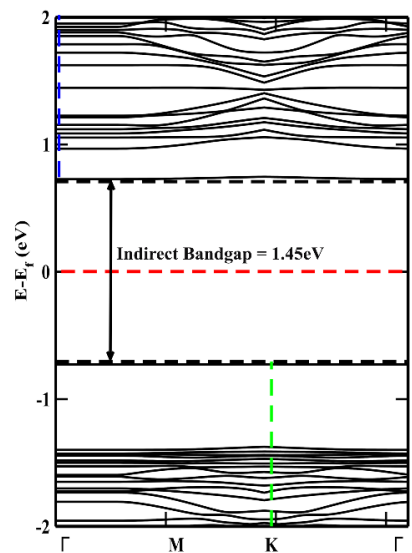

**OH functionalised armchair BPNR**

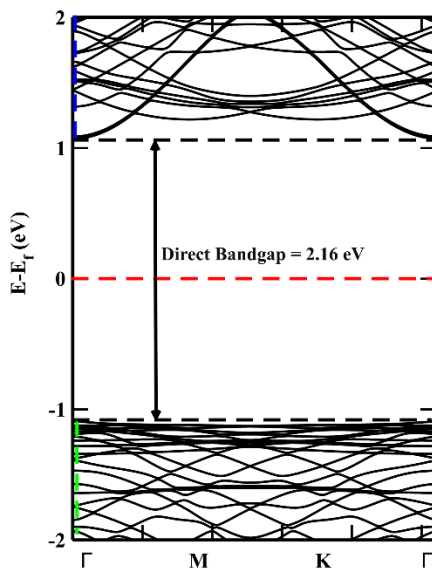

**NH<sub>2</sub> functionalised zigzag BPNR**

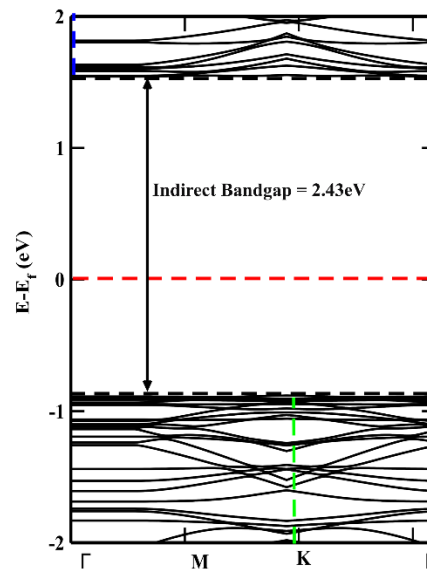

**NH<sub>2</sub> functionalised armchair BPNR**

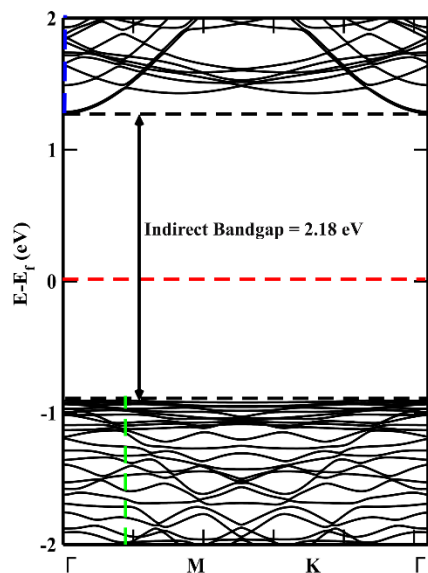

CONH<sub>2</sub> functionalised zigzag BPNR

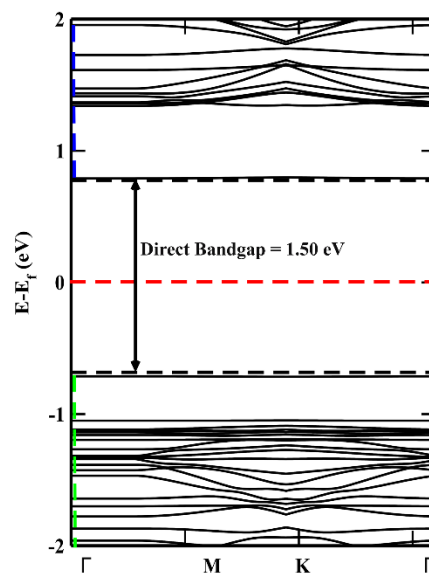

CONH<sub>2</sub> functionalised armchair BPNR

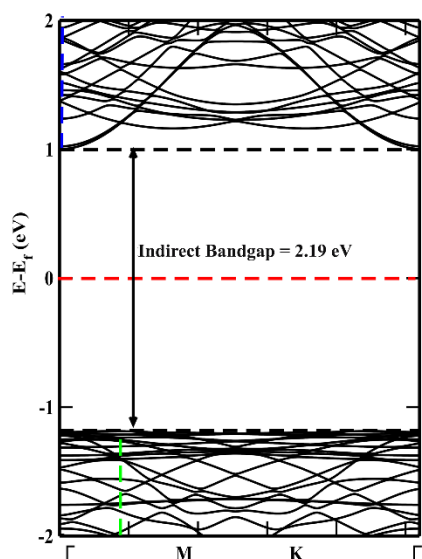

SH functionalised zigzag BPNR

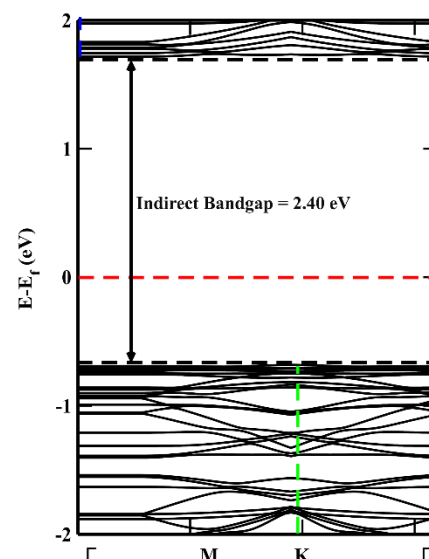

SH functionalised armchair BPNR

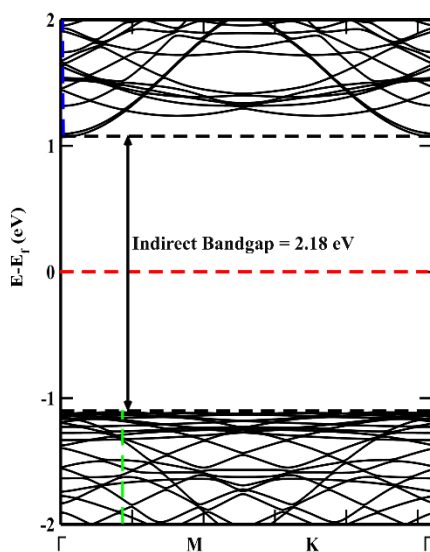

C<sub>6</sub>H<sub>5</sub> functionalised zigzag BPNR

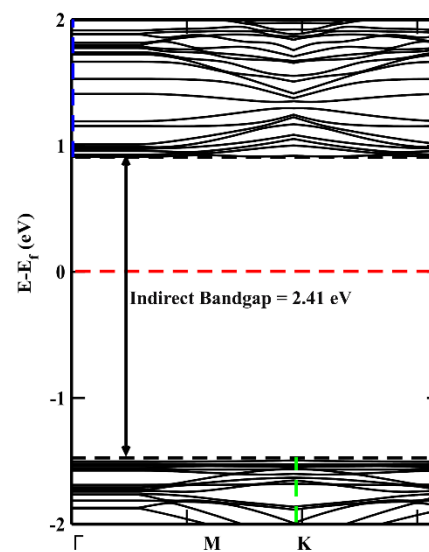

C<sub>6</sub>H<sub>5</sub> functionalised armchair BPNR

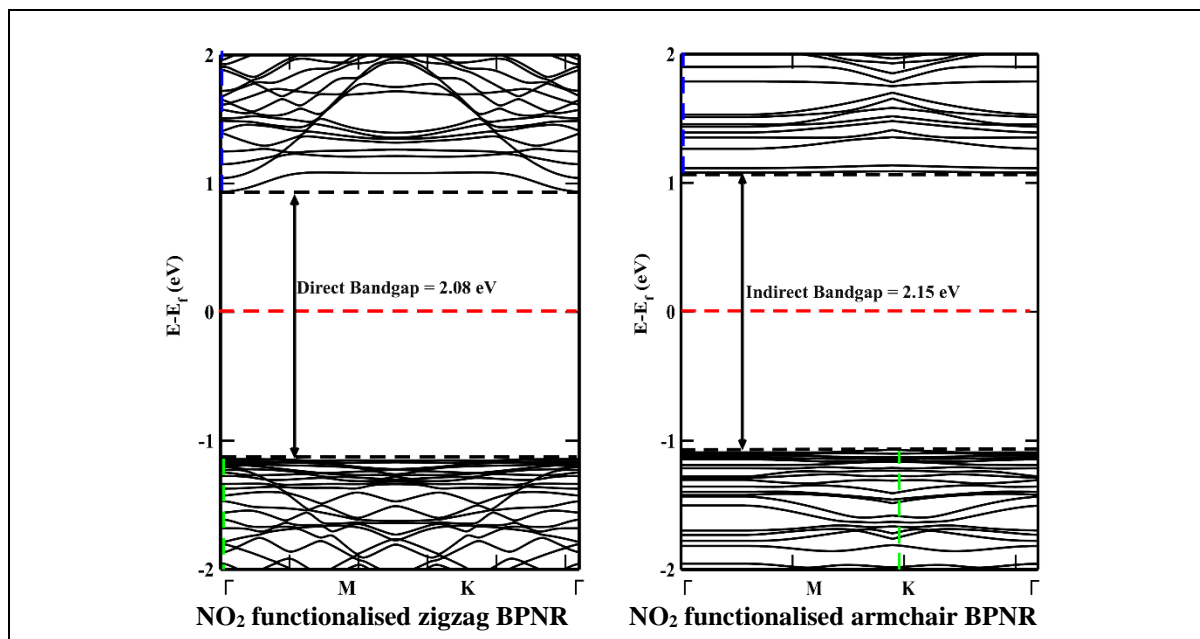

Fig.S3 Band structures of functionalised zigzag and armchair BPNRs.

Table S1: Band edge positions (CBM and VBM) of functionalised BPNRs.

| Functional groups             | Zigzag functionalised BPNRs |        | Armchair functionalised BPNRs |        |
|-------------------------------|-----------------------------|--------|-------------------------------|--------|
|                               | CBM                         | VBM    | CBM                           | VBM    |
| CH <sub>3</sub> O             | -2.644                      | -4.811 | -2.723                        | -4.036 |
| COOCH <sub>3</sub>            | -2.633                      | -4.809 | -2.376                        | -4.788 |
| CHO                           | -2.729                      | -4.887 | -2.596                        | -4.887 |
| COOH                          | -2.650                      | -4.829 | -2.383                        | -4.774 |
| OH                            | -2.673                      | -4.856 | -2.612                        | -4.066 |
| NH <sub>2</sub>               | -2.589                      | -4.753 | -2.327                        | -4.751 |
| CONH <sub>2</sub>             | -2.594                      | -4.776 | -2.930                        | -4.433 |
| SH                            | -2.658                      | -4.847 | -2.404                        | -4.802 |
| C <sub>6</sub> H <sub>5</sub> | -2.611                      | -4.792 | -2.327                        | -4.736 |
| NO <sub>2</sub>               | -2.864                      | -4.944 | -2.730                        | -4.879 |

**Table S2: Adsorption energy, O-H bond length of zigzag functionalised water adsorbed BPNRs**

| FUNCTIONAL GROUP              | SITES | ADSORPTION ENERGY (eV) | O-H-I BOND LENGTH(Å) | O-H-II BOND LENGTH (Å) |
|-------------------------------|-------|------------------------|----------------------|------------------------|
| CH <sub>3</sub> O             | A     | -0.842                 | 0.989                | 0.966                  |
|                               | B     | -0.568                 | 0.982                | 0.981                  |
|                               | C     | -0.479                 | 0.978                | 0.974                  |
|                               | D     | -0.456                 | 0.976                | 0.970                  |
| COOCH <sub>3</sub>            | A     | -0.677                 | 0.984                | 0.968                  |
|                               | B     | -0.582                 | 0.983                | 0.979                  |
|                               | C     | -0.568                 | 0.980                | 0.979                  |
|                               | D     | -0.586                 | 0.984                | 0.980                  |
| CHO                           | A     | -0.514                 | 0.973                | 0.971                  |
|                               | B     | -0.433                 | 0.977                | 0.969                  |
|                               | C     | -0.576                 | 0.981                | 0.980                  |
|                               | D     | -0.590                 | 0.981                | 0.980                  |
| COOH                          | A     | -0.637                 | 0.979                | 0.968                  |
|                               | B     | -0.513                 | 0.977                | 0.977                  |
|                               | C     | -0.565                 | 0.982                | 0.981                  |
|                               | D     | -0.579                 | 0.981                | 0.980                  |
| OH                            | A     | -0.959                 | 0.989                | 0.974                  |
|                               | B     | -0.578                 | 0.983                | 0.980                  |
|                               | C     | -0.568                 | 0.982                | 0.980                  |
|                               | D     | -0.458                 | 0.976                | 0.971                  |
| NH <sub>2</sub>               | A     | -0.794                 | 0.986                | 0.983                  |
|                               | B     | -0.587                 | 0.982                | 0.980                  |
|                               | C     | -0.573                 | 0.981                | 0.981                  |
|                               | D     | -0.584                 | 0.980                | 0.980                  |
| CONH <sub>2</sub>             | A     | -0.979                 | 0.999                | 0.965                  |
|                               | B     | -0.550                 | 0.983                | 0.981                  |
|                               | C     | -0.435                 | 0.977                | 0.971                  |
|                               | D     | -0.565                 | 0.983                | 0.979                  |
| SH                            | A     | -0.787                 | 0.989                | 0.975                  |
|                               | B     | -0.567                 | 0.982                | 0.980                  |
|                               | C     | -0.450                 | 0.977                | 0.970                  |
|                               | D     | -0.582                 | 0.983                | 0.980                  |
| C <sub>6</sub> H <sub>5</sub> | A     | -0.665                 | 0.984                | 0.972                  |
|                               | B     | -0.553                 | 0.983                | 0.979                  |
|                               | C     | -0.440                 | 0.978                | 0.971                  |
|                               | D     | -0.574                 | 0.982                | 0.981                  |
| NO <sub>2</sub>               | A     | -0.738                 | 0.980                | 0.968                  |
|                               | B     | -0.452                 | 0.978                | 0.971                  |
|                               | C     | -0.590                 | 0.982                | 0.980                  |
|                               | D     | -0.601                 | 0.983                | 0.980                  |



**Table S3: Adsorption energy, O-H bond length of armchair functionalised water adsorbed BPNRs**

| FUNCTIONAL GROUP              | SITES | ADSORPTION ENERGY (eV) | O-H-I BOND LENGTH(Å) | O-H-II BOND LENGTH (Å) |
|-------------------------------|-------|------------------------|----------------------|------------------------|
| CH <sub>3</sub> O             | A     | -0.766                 | 0.987                | 0.969                  |
|                               | B     | -0.565                 | 0.985                | 0.971                  |
|                               | C     | -0.5                   | 0.982                | 0.969                  |
|                               | D     | -0.542                 | 0.982                | 0.980                  |
| COOCH <sub>3</sub>            | A     | -0.424                 | 0.974                | 0.968                  |
|                               | B     | -0.526                 | 0.981                | 0.978                  |
|                               | C     | -0.469                 | 0.977                | 0.975                  |
|                               | D     | -0.479                 | 0.977                | 0.976                  |
| CHO                           | A     | -0.876                 | 0.991                | 0.967                  |
|                               | B     | -0.636                 | 0.977                | 0.977                  |
|                               | C     | -0.476                 | 0.976                | 0.976                  |
|                               | D     | -0.558                 | 0.983                | 0.979                  |
| COOH                          | A     | -0.652                 | 0.977                | 0.974                  |
|                               | B     | -0.439                 | 0.976                | 0.973                  |
|                               | C     | -0.483                 | 0.976                | 0.976                  |
|                               | D     | -0.483                 | 0.977                | 0.976                  |
| OH                            | A     | -0.690                 | 0.990                | 0.969                  |
|                               | B     | -0.472                 | 0.976                | 0.969                  |
|                               | C     | -0.577                 | 0.983                | 0.981                  |
|                               | D     | -0.481                 | 0.976                | 0.975                  |
| NH <sub>2</sub>               | A     | -0.545                 | 0.977                | 0.968                  |
|                               | B     | -0.572                 | 0.981                | 0.981                  |
|                               | C     | -0.560                 | 0.981                | 0.980                  |
|                               | D     | -0.490                 | 0.977                | 0.975                  |
| CONH <sub>2</sub>             | A     | -0.705                 | 0.991                | 0.968                  |
|                               | B     | -0.442                 | 0.976                | 0.974                  |
|                               | C     | -0.549                 | 0.981                | 0.980                  |
|                               | D     | -0.549                 | 0.984                | 0.972                  |
| SH                            | A     | -0.516                 | 0.980                | 0.968                  |
|                               | B     | -0.497                 | 0.976                | 0.975                  |
|                               | C     | -0.492                 | 0.977                | 0.974                  |
|                               | D     | -0.488                 | 0.978                | 0.974                  |
| C <sub>6</sub> H <sub>5</sub> | A     | -0.506                 | 0.979                | 0.975                  |
|                               | B     | -0.473                 | 0.976                | 0.975                  |
|                               | C     | -0.482                 | 0.976                | 0.976                  |
|                               | D     | -0.466                 | 0.976                | 0.975                  |
| NO <sub>2</sub>               | A     | -0.466                 | 0.972                | 0.975                  |
|                               | B     | -0.417                 | 0.977                | 0.972                  |
|                               | C     | -0.479                 | 0.976                | 0.974                  |
|                               | D     | -0.484                 | 0.977                | 0.974                  |
